# Supplementary material for: Molecular diagnosis of pediatric patients with citrin deficiency in China: SLC25A13 mutation spectrum and the geographic distribution
Source: PubMed Central journal article supplement (PMC4942605; doi:10.1038/srep29732), 2016-07-11
Supplement: srep29732-s1.pdf [file srep29732-s1.pdf]

**Molecular diagnosis of pediatric patients with citrin deficiency in China: *SLC25A13* mutation spectrum and the geographic distribution**

Wei-Xia Lin, Han-Shi Zeng, Zhan-Hui Zhang, Man Mao, Qi-Qi Zheng, Shu-Tao Zhao, Ying Cheng, Feng-Ping Chen,

Wang-Rong Wen & Yuan-Zong Song

35

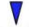

|                      |                                                              |
|----------------------|--------------------------------------------------------------|
| <b>Homo_sapiens</b>  | FLKYASIEKNGEFFMSPNDFVTRYLNIFGESQPNPKTVELLSGVVDQTKDGLISFQEFVA |
| <b>C. elegans</b>    | FDRFATKEIKGKKLMTPEDFIRGYLGLYTEENYNKETVRLLASAADTTKDGLISFEFCA  |
| <b>Opossum</b>       | ---YASIEKDGEFFMCPEDFLCRFLNIFGGCQPSPELQLLGGVVDQTKDGLINFQEFIA  |
| <b>X. tropicalis</b> | FYKYASVEKNGDYFMSPLDFVRRYLNLSGDGEPNPKTLQLLAGVVDQTKDGLISFQEFVA |
| <b>Chicken</b>       | FLKYASVEKNGEFFMSPNDFVTRYLKIIGDGLPNANTVQLLAGVVDQTKDGLISFQEFVA |
| <b>Pig</b>           | FKKYASIEKNGEFFMSPNDFVTRYLNIFGESQPNPKTVELLSGVVDQTKDGLISFQEFVA |
| <b>Cow</b>           | FKQYASIEKNGEFFMSPNDFVTRYLNIFGESQPNPKTVELLSGVVDQTKDGLISFQEFVA |
| <b>Mouse</b>         | FLKYASIEKNGEFFMSPHDFVTRYLNIFGESQPNPKTVELLSGVVDQTKDGLISFQEFVA |
| <b>Rat</b>           | FLKYASIEKNGEFFMSPHDFVTRYLNIFGESQPNPKTVELLSGVVDQTKDGLISFQEFVA |
| <b>Chimpanzee</b>    | FLKYASIEKNGEFFMSPNDFVTRYLNIFGESQPNPKTVELLSGVVDQTKDGLISFQEFVA |
| <b>Dog</b>           | FLKYASIEKNGEFFMSPNDFVTRYLNIFGESQPNPKTVELLSGVVDQTKDGLISFQEFVA |

**Supplemental Information 1. Alignment analysis of the homologous proteins.** The mutation p.M35V affected an amino acid highly conserved in all 11 homologous proteins from 11 eukaryotic species, including human (*Homo sapiens*), chimpanzee, dog, pig, cow, rat, mouse, chicken, *Xenopus tropicalis* (*X. tropicalis*), opossum and *Caenorhabditis elegans* (*C. elegans*).
